# Supplementary material for: Gold, silver and nickel nanoparticle anchored cellulose nanofiber composites as highly active catalysts for the rapid and selective reduction of nitrophenols in water
Source: PubMed Central journal article supplement (PMC9077553; doi:10.1039/c7ra10489h), 2018-01-17
Supplement: RA-008-C7RA10489H-s001.pdf [file RA-008-C7RA10489H-s001.pdf]

## **Supporting Information**

Gold, silver and nickel nanoparticles anchored cellulose nanofiber composites as highly active catalysts for the rapid and selective reduction of nitrophenols in water

Mayakrishnan Gopiraman,<sup>a</sup> Dian Deng,<sup>b</sup> Somasundaram Saravanamoorthy,<sup>c</sup> Ill-Min Chung,<sup>a,\*</sup> and Ick Soo Kim,<sup>b,\*</sup>

<sup>a</sup>*Department of Applied Bioscience, College of Life & Environment Science, Konkuk University, 120 Neungdong-ro, Gwangjin-gu, Seoul 05029, South Korea. E-mail: [imcim@konkuk.ac.kr](mailto:imcim@konkuk.ac.kr), [illminchung@gmail.com](mailto:illminchung@gmail.com)*

<sup>b</sup>*Nano Fusion Technology Research Group, Division of Frontier Fibers, Institute for Fiber Engineering (IFES), Interdisciplinary Cluster for Cutting Edge Research (ICCER), Shinshu University, Tokida 3-15-1, Ueda, Nagano prefecture, 386-8567, Japan. E-mail: [kimicksoo.gr@gmail.com](mailto:kimicksoo.gr@gmail.com)*

<sup>c</sup>*Department of Chemistry, National Institute of Technology, Tiruchirappalli 620 015, India*

**Table S1** Metal content of the nanofiber composites determined by SEM-EDS and ICP-MS analysis

|         | <b>Catalysts</b>             |               |               |
|---------|------------------------------|---------------|---------------|
|         | <b>Au/CNF</b>                | <b>Ni/CNF</b> | <b>Ag/CNF</b> |
|         | ICP-MS data (metal content)  |               |               |
|         | 9.45 wt%                     | 21.45 wt%     | 22.94 wt%     |
|         | SEM-EDS data (metal content) |               |               |
| Spot 1  | 10.9 wt%                     | 21.8 wt%      | 22.9 wt%      |
| Spot 2  | 9.5 wt%                      | 20.8 wt%      | 21.5 wt%      |
| Spot 3  | 8.7 wt%                      | 21.9 wt%      | 23.4 wt%      |
| Average | 9.7 wt%                      | 21.8 wt%      | 22.6 wt%      |

**Table S2.** UHPLC quantitative analysis of aminophenol and nitrophenol before and after reduction reaction (See **Fig S4-S11** and **Fig S15**)

| <b>S. No</b> | <b>Catalyst</b> | <b>4-NP</b>   |              | <b>4-AP</b>   |              |
|--------------|-----------------|---------------|--------------|---------------|--------------|
|              |                 | <b>before</b> | <b>after</b> | <b>before</b> | <b>after</b> |
| 1            | Ni/CNF          | 0.114 mg      | 0.0          | 0.0           | 0.0869 mg    |
| 2            | Au/CNF          | 0.113 mg      | 0.0          | 0.0           | 0.0867 mg    |
| 3            | Ag/CNF          | 0.121 mg      | 0.0          | 0.0           | 0.0919 mg    |
|              |                 | <b>2-NP</b>   |              | <b>2-AP</b>   |              |
| 4            | Ni/CNF          | 0.050 mg      | 0.0          | 0.0           | 0.041 mg     |
| 5            | Au/CNF          | 0.062 mg      | 0.0          | 0.0           | 0.049 mg     |
| 6            | Ag/CNF          | 0.048 mg      | 0.0          | 0.0           | 0.039 mg     |

Calculated using UHPLC peak area

**Table S3.** UV-vis quantitative analysis of aminophenol and nitrophenol before and after reduction reaction (See **Fig S16-20**)

| S. No | Catalyst | 4-NP     |       | 4-AP   |           |
|-------|----------|----------|-------|--------|-----------|
|       |          | before   | after | before | after     |
| 1     | Ni/CNF   | 0.113 mg | 0.0   | 0.0    | 0.0865 mg |
| 2     | Au/CNF   | 0.107 mg | 0.0   | 0.0    | 0.0817 mg |
| 3     | Ag/CNF   | 0.123 mg | 0.0   | 0.0    | 0.0922 mg |
|       |          | 2-NP     |       | 2-AP   |           |
| 4     | Ni/CNF   | 0.047 mg | 0.0   | 0.0    | 0.043 mg  |
| 5     | Au/CNF   | 0.057 mg | 0.0   | 0.0    | 0.049 mg  |
| 6     | Ag/CNF   | 0.046 mg | 0.0   | 0.0    | 0.039 mg  |

Calculated using UV absorbance

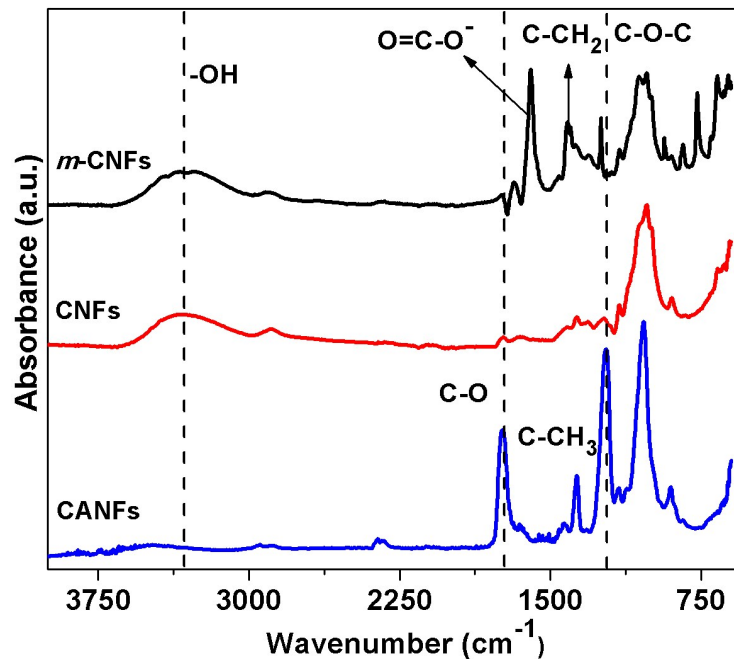

**Fig. S1.** FTIR spectra of CANFs, CNFs and *m*-CNFs (Reprinted with permission from ref. 1.

Copyright 2015, Elsevier.)

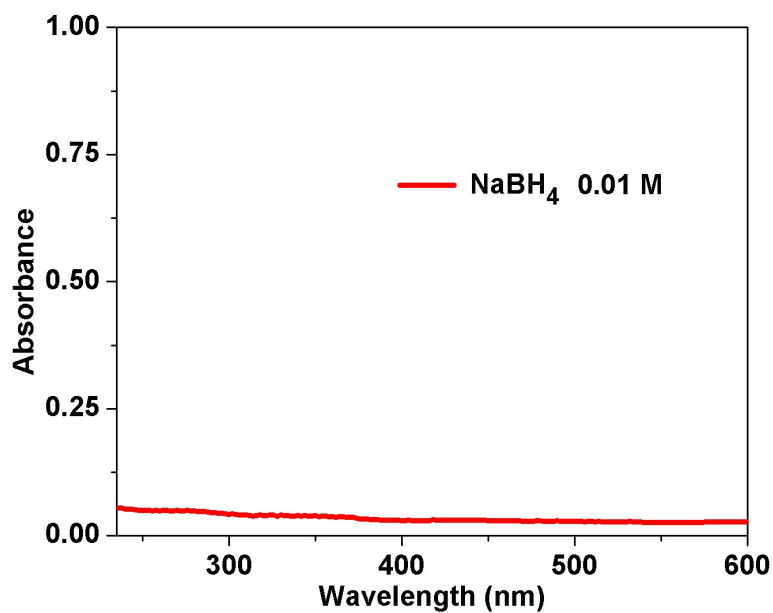

**Fig. S2.** UV-vis spectrum of  $\text{NaBH}_4$  in aqueous solution (0.01 M).

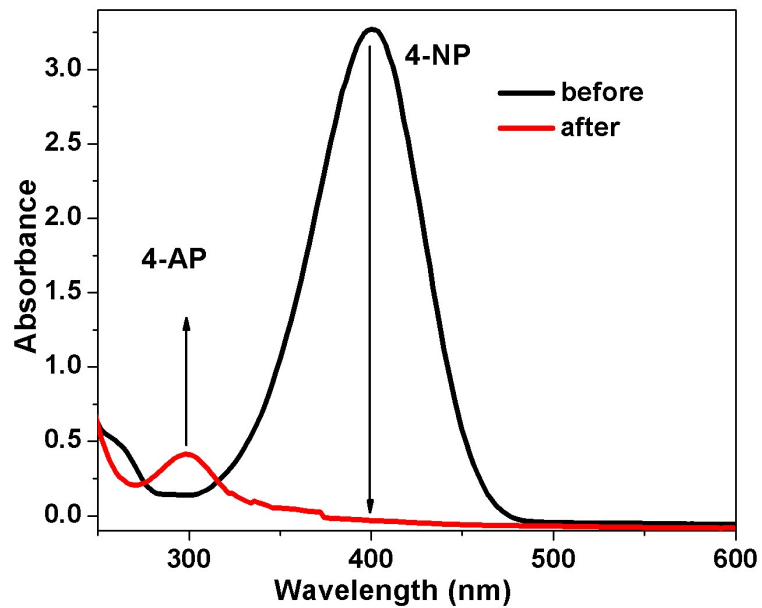

**Fig. S3.** UV-Vis spectra for the reduction of 4-NP before and after reduction reaction.

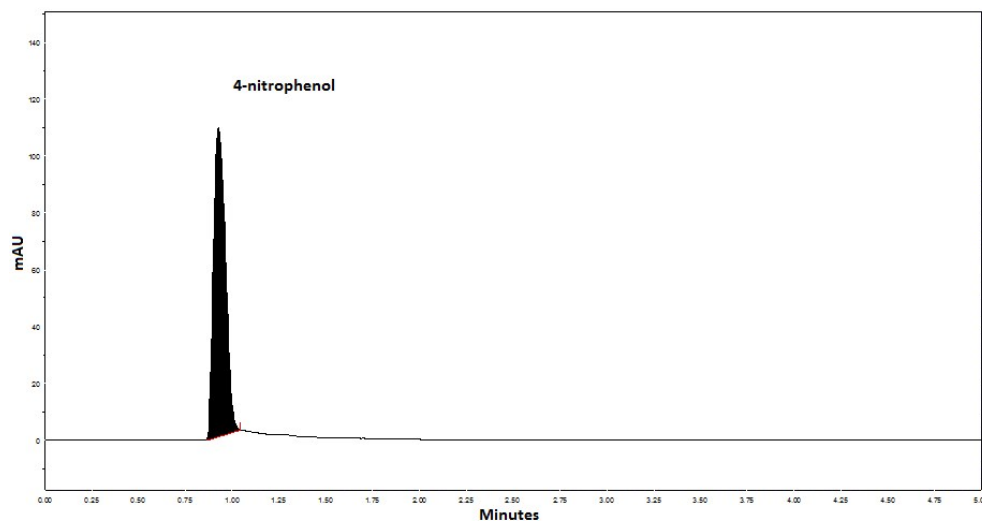

**Fig. S4.** UHPLC chromatogram of 4-nitrophenol in aqueous solution.

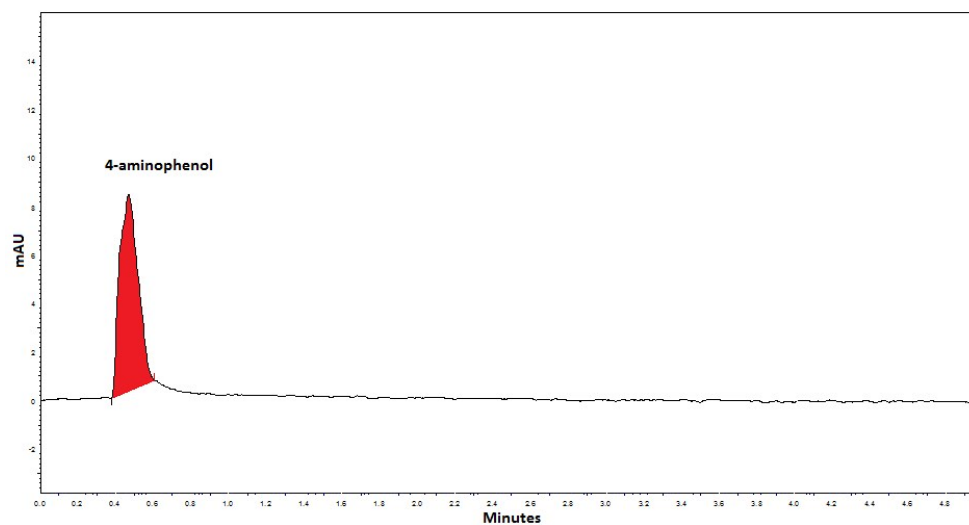

**Fig. S5.** UHPLC chromatogram of reductive product of 4-nitrophenol catalyzed by Ni/CNF.

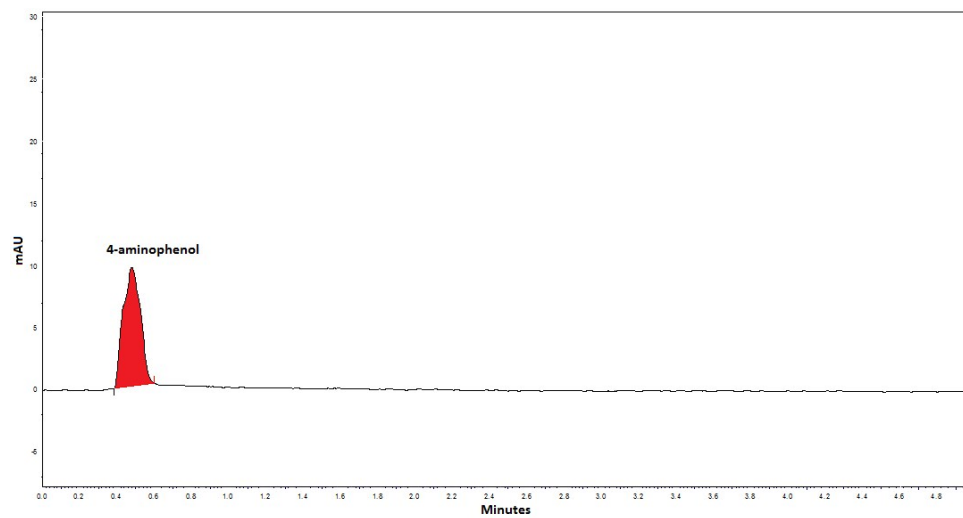

**Fig. S6.** UHPLC chromatogram of reductive product of 4-nitrophenol catalyzed by Au/CNF.

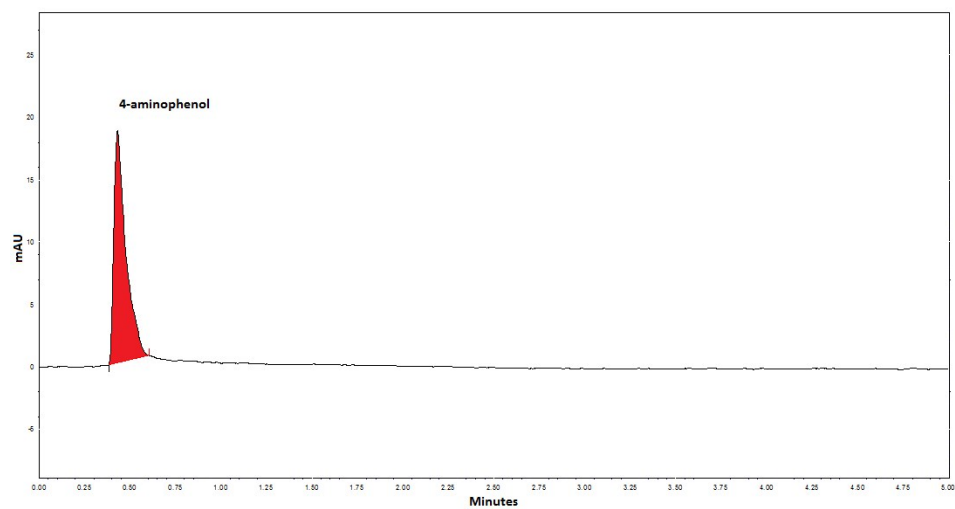

**Fig. S7.** UHPLC chromatogram of reductive product of 4-nitrophenol catalyzed by Ag/CNF.

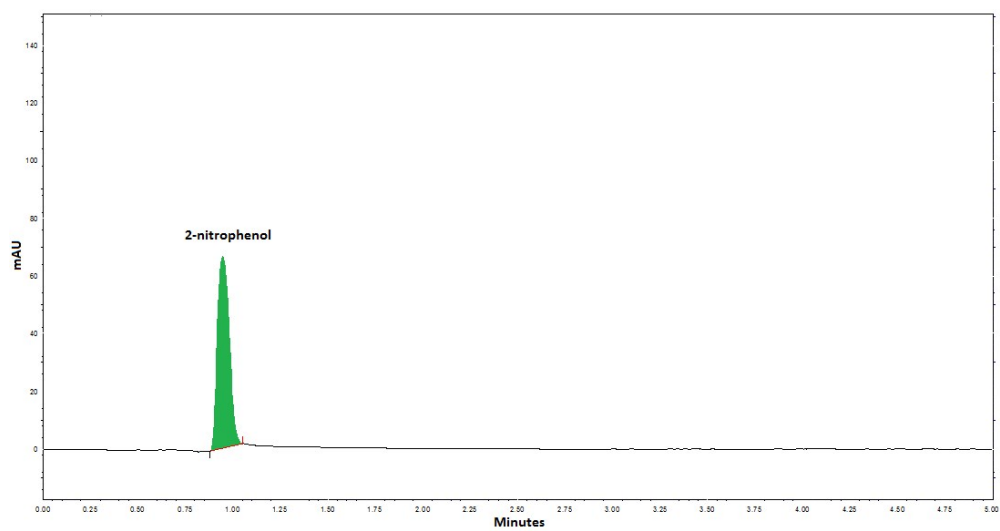

**Fig. S8.** UHPLC chromatogram of 2-nitrophenol in water.

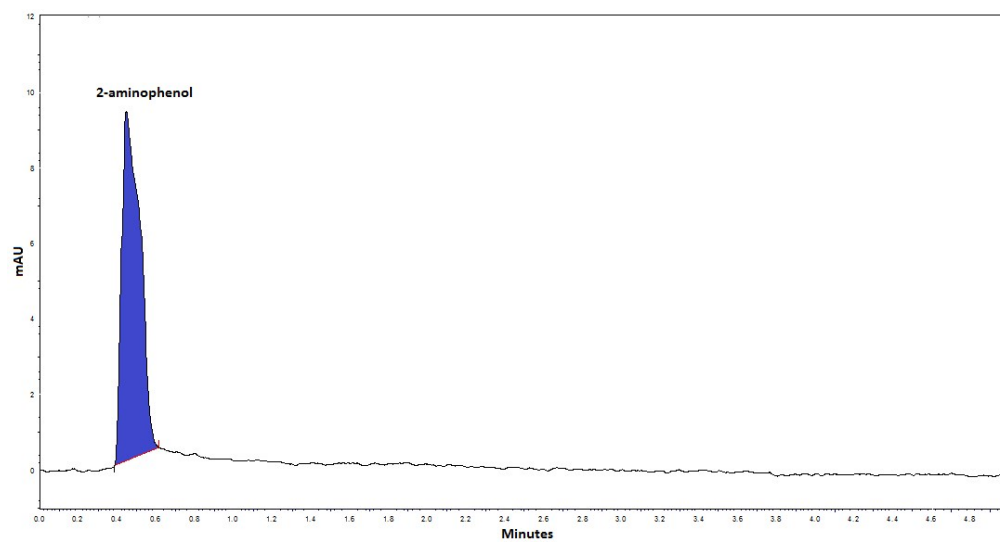

**Fig. S9.** UHPLC chromatogram of reductive product of 2-nitrophenol catalyzed by Ni/CNF.

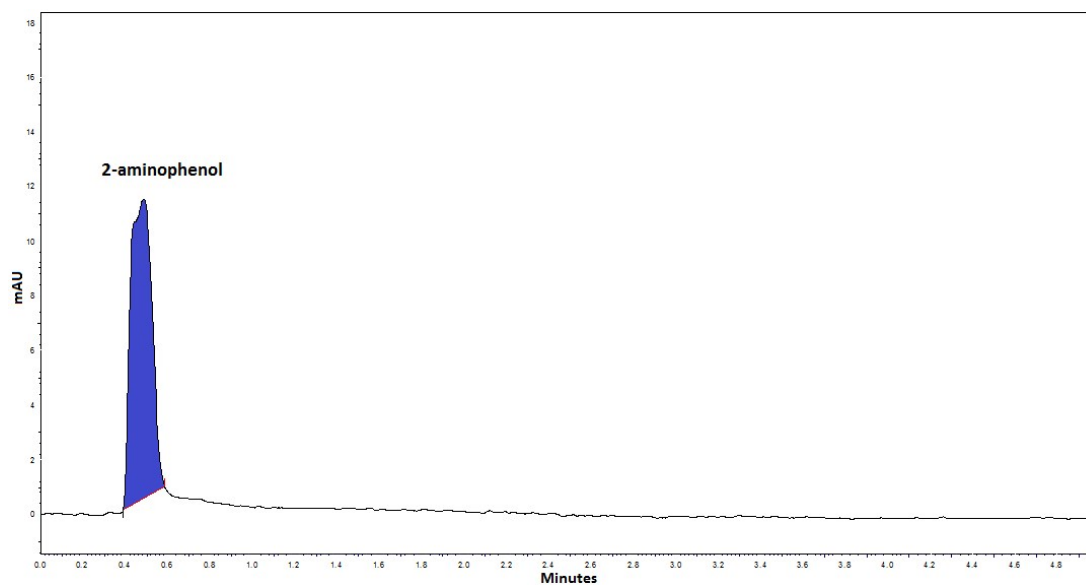

**Fig. S10.** UHPLC chromatogram of reductive product of 2-nitrophenol catalyzed by Au/CNF.



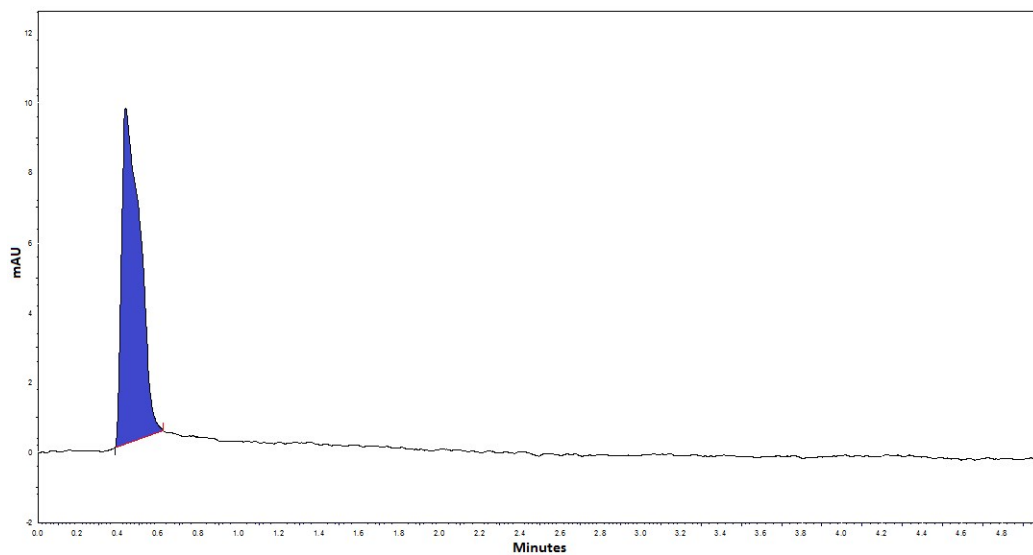

**Fig. S11.** UHPLC chromatogram of reductive product of 2-nitrophenol catalyzed by Ag/CNF.

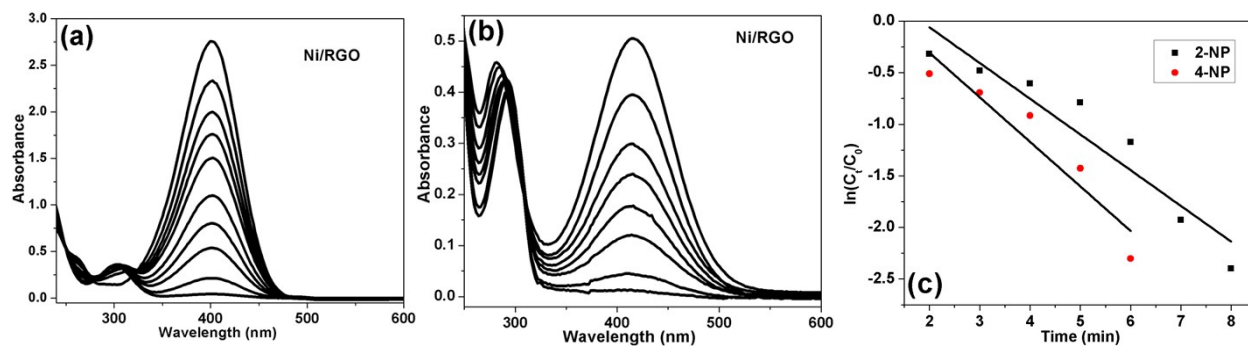

**Fig. S12.** UV-Vis spectra for the reduction of (a) 4-NP and (b) 2-NP in aqueous solution recorded every 1 min using 0.9 mg of Ni/RGO, and (c) plots of  $\ln[C_t/C_0]$  versus reaction time for reduction of 4-NP and 2-NP with  $\text{NaBH}_4$  over Ni/RGO.

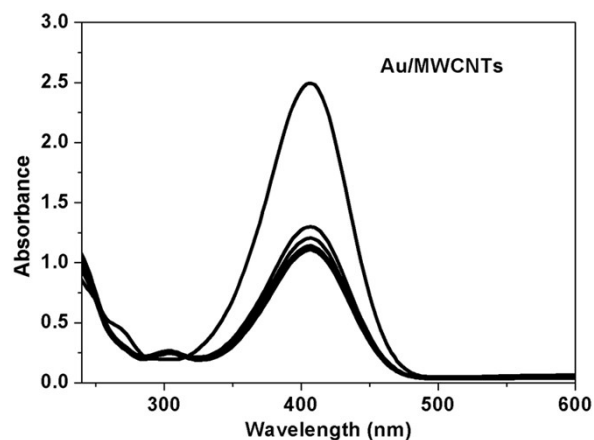

**Fig. S13.** UV–Vis spectra for the reduction of 4-NP in aqueous solution recorded every 5 min using 0.9 mg of Au/MWCNTs.

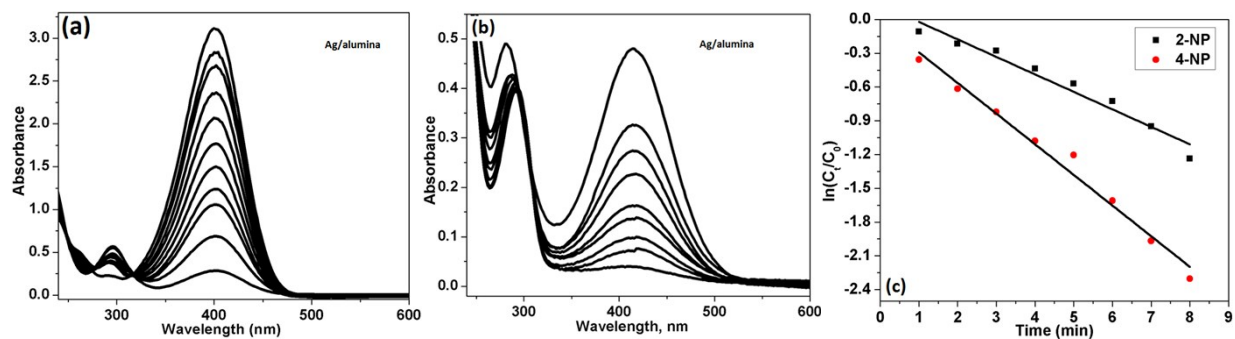

**Fig. S14.** UV–Vis spectra for the reduction of (a) 4-NP and (b) 2-NP in aqueous solution recorded every 1 min using 0.9 mg of Ag/alumina, and (c) plots of  $\ln[C_t/C_0]$  versus reaction time for reduction of 4-NP and 2-NP with  $\text{NaBH}_4$  over Ag/alumina.

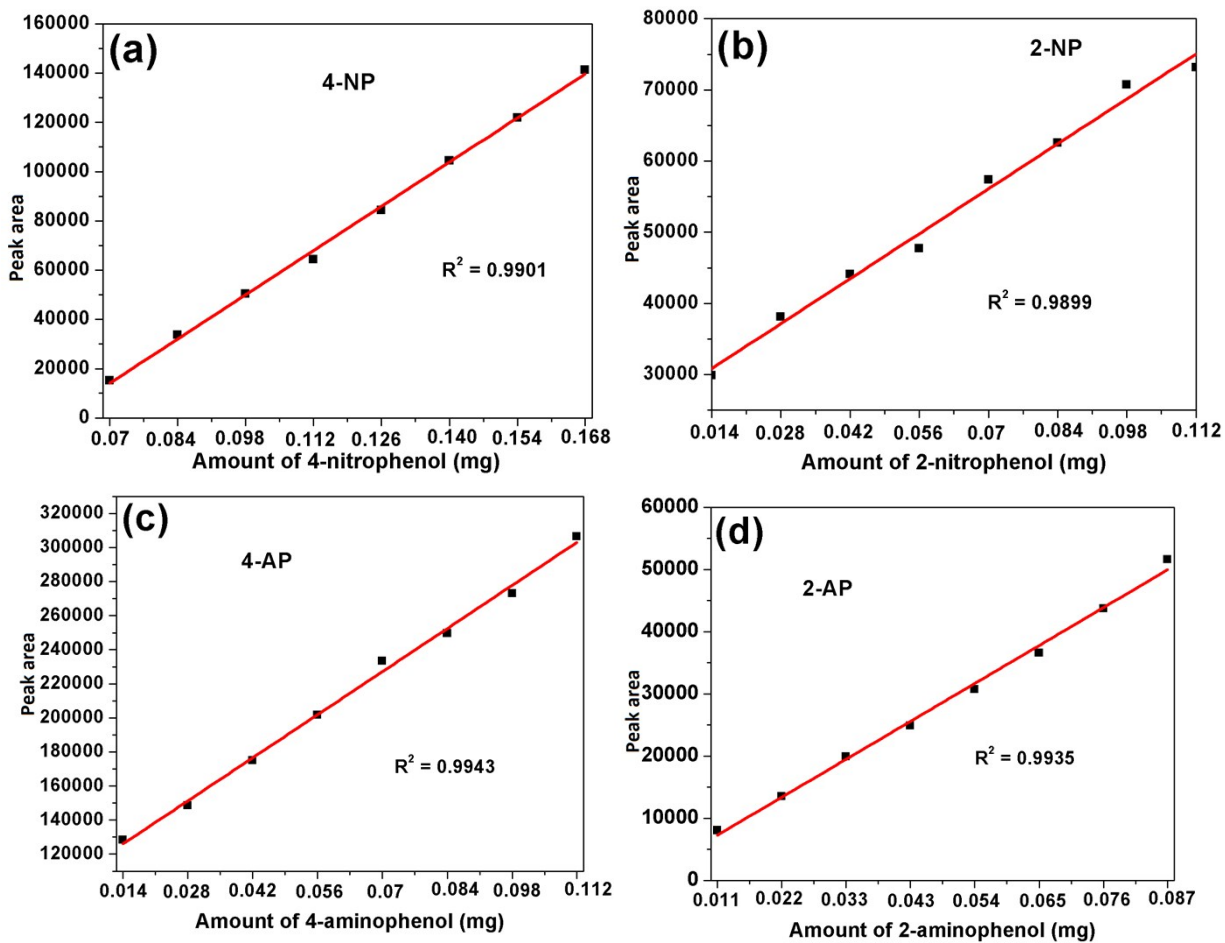

**Fig S15.** Plots of UHPLC peak area *versus* amount of (a) 4-nitrophenol, (b) 2-nitrophenol, (3) 4-aminophenol and (d) 2-aminophenol.

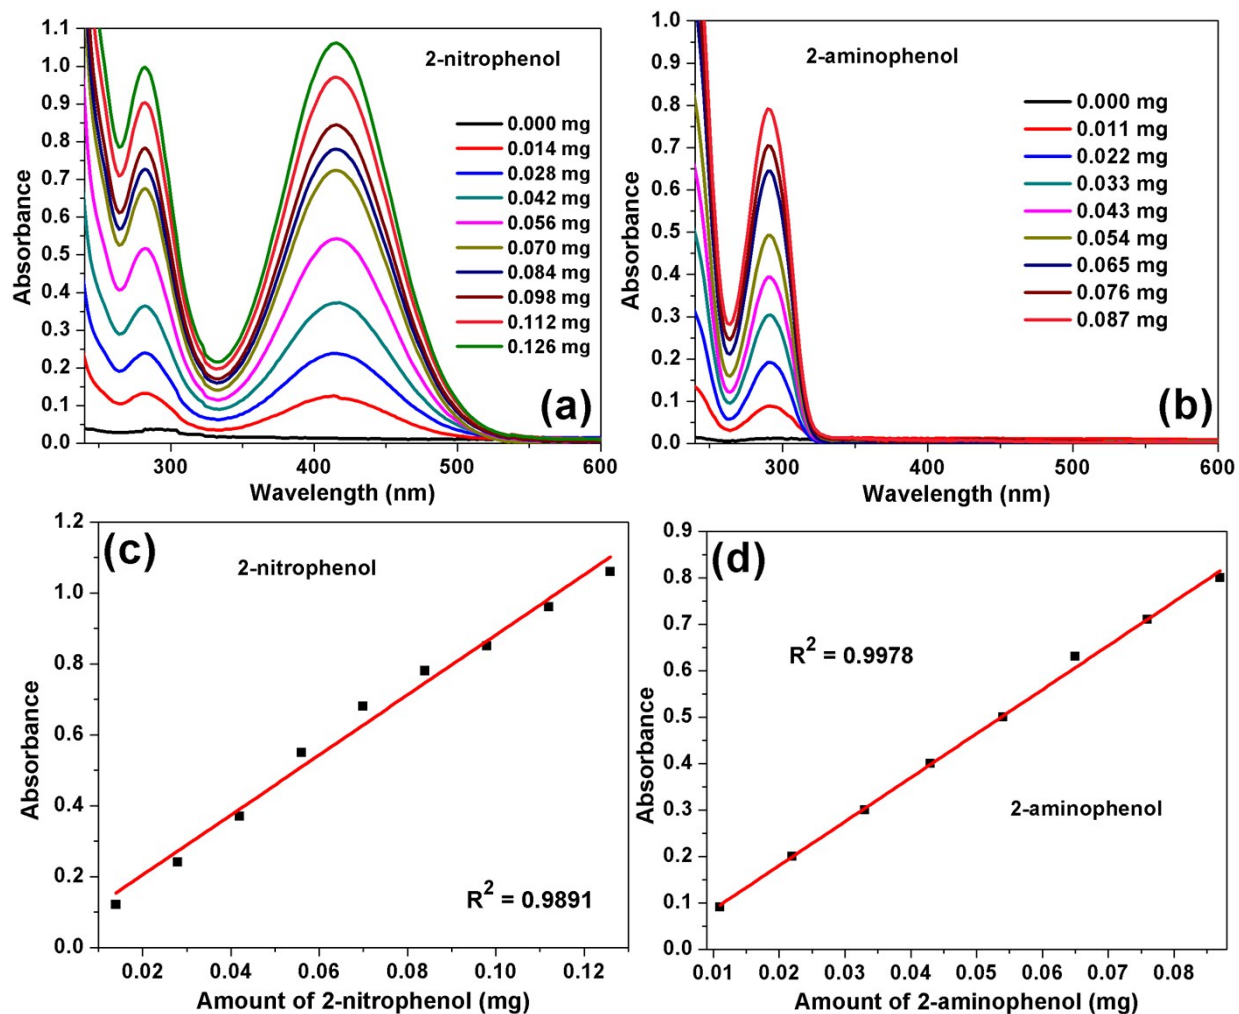

**Fig S16.** UV–Vis spectra of (a) 2-nitrophenol and (b) 2-aminophenol in aqueous NaBH<sub>4</sub> solution, and plots of UV absorbance *versus* amount of (c) 2-nitrophenol and (d) 2-aminophenol.

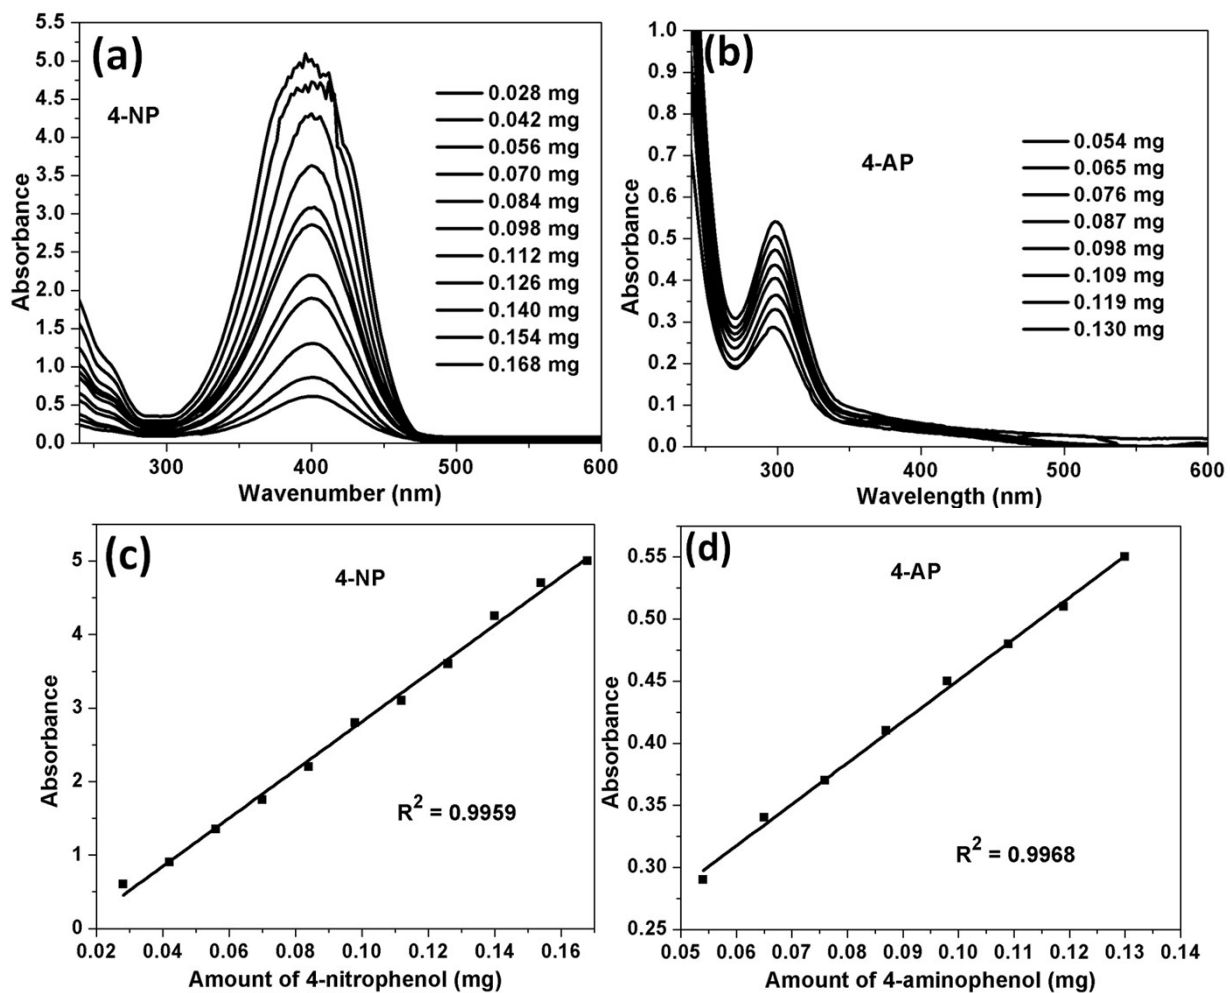

**Fig S17.** UV-Vis spectra of (a) 4-nitrophenol and (b) 4-aminophenol in aqueous NaBH<sub>4</sub> solution, and plots of UV absorbance *versus* amount of (c) 4-nitrophenol and (d) 4-aminophenol.

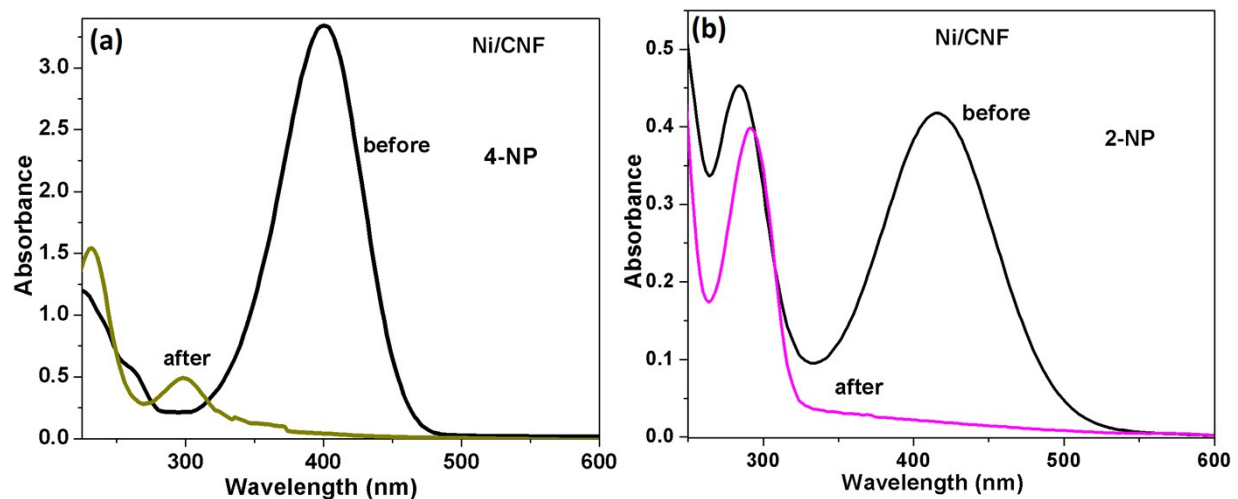

**Fig. S18.** UV-Vis spectra for the reduction of (a) 4-NP and (b) 2-NP in aqueous solution recorded before and after addition 0.9 mg of Ni/CNF.

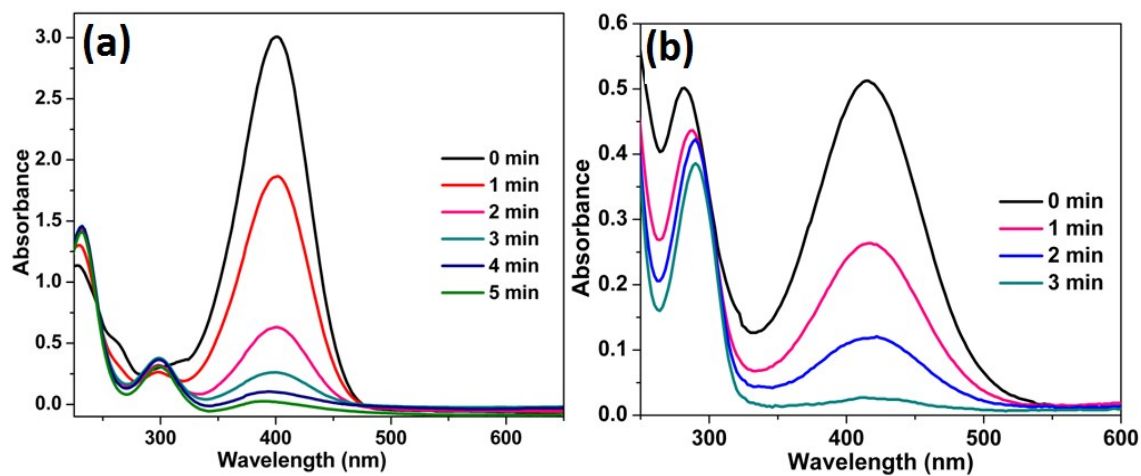

**Fig. S19.** UV-Vis spectra for the reduction of (a) 4-NP and (b) 2-NP in aqueous solution recorded every 1 min using 0.9 mg of Au/CNF.

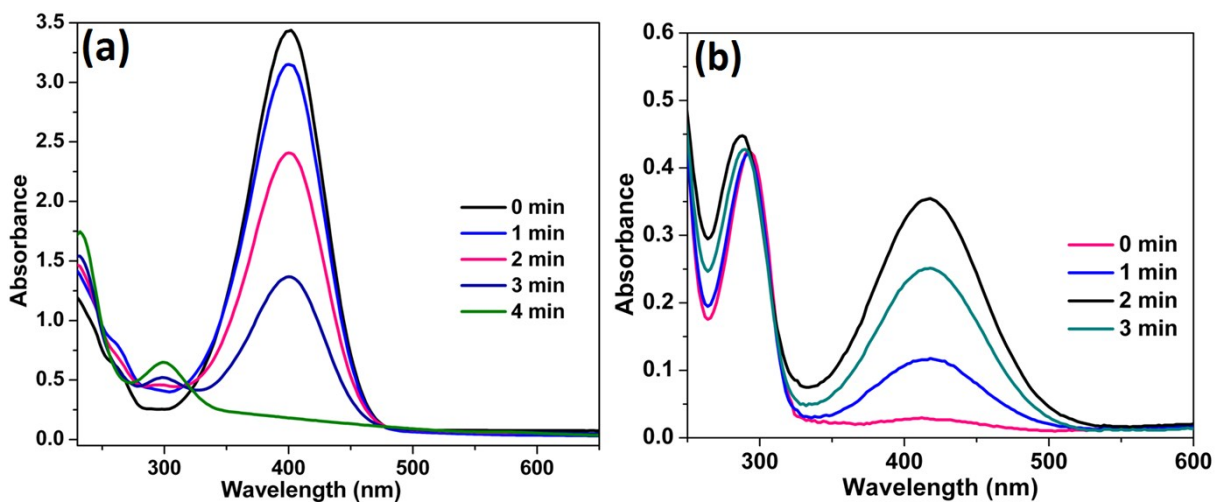

**Fig. S20.** UV-Vis spectra for the reduction of (a) 4-NP and (b) 2-NP in aqueous solution recorded every 1 min using 0.9 mg of Ag/CNF.

## References:

1. M. Gopiraman, H. Bang, G. Yuan, C. Yin, K. H. Song, J. S. Lee, I. M. Chung, R. Karvembu and I. S. Kim, *Carbohydr Polym.*, 2015, **132**, 554-564.
